# Glycemic Index, Dietary Fiber, and Risk of Type 2 Diabetes in a Cohort of Older Australians

ALAN W. BARCLAY, BSC<sup>1</sup>  
VICTORIA M. FLOOD, PHD<sup>2,3</sup>  
ELENA ROCHTCHINA, MAPPSTAT<sup>2</sup>

PAUL MITCHELL, MD, PHD<sup>2</sup>  
JENNIE C. BRAND-MILLER, PHD<sup>1</sup>

**T**he role of glycemic index (GI) in the prevention of diabetes remains controversial. Some, but not all, prospective cohort studies have yielded positive relationships (1–8). A significant limitation of studies to date has been the fact that the food frequency questionnaires (FFQs) used were not validated for their ability to accurately assess GI. The purpose of this study was to assess the relationship of GI and fiber with incidence of type 2 diabetes in older Australians whose dietary intake was estimated by a fully validated FFQ.

## RESEARCH DESIGN AND METHODS

In 1991, 4,433 residents aged 49+ years were identified, of which 3,654 (82%) participated in detailed examinations during 1992–1994 (9,10). Of these, 2,335 (75% of survivors) returned for 5-year and 1,952 (76%) for 10-year examinations (2002–2004). Individuals were largely of Caucasian origin and broadly representative of the older Australian population (11).

Diagnostic criteria were either self-reported diabetes and current use of diabetes medications or fasting glucose concentration  $\geq 126$  mg/dl (12). Diabetes incidence was defined in participants without diabetes at baseline who were diagnosed with diabetes before or at the 5-

or 10-year follow-up. In total, 2,564 individuals were followed from baseline. After excluding 163 participants with existing diabetes and 52 with missing data, 2,349 were considered at risk of incident diabetes. An additional 226 participants did not have fasting blood tests at either the 5- or 10-year follow-up due to failure to fast or refusal on the day, leaving 2,123 with data for the assessment of 10-year incident diabetes.

Participants were sent a questionnaire that included items on diet and physical activity. The 145-item semiquantitative FFQ was modified from an earlier FFQ (13). FFQs with over 12 items missing or with implausible values ( $<500$  calories/day or  $>4,000$  calories/day) were excluded (14). Data were entered into a database (15) using Australian food composition tables (16) and published GI values (glucose = 100) (17). The average GI for each participant was calculated by summing the weighted GI of individual foods, with weighting proportional to the contribution to total carbohydrate intake. A validation study determined a correlation coefficient of 0.82 and correct classification of 85% of people within one quintile for dietary fiber and a coefficient of 0.57 and correct classification of 74% within one quintile for GI (18). Physical activity (as metabolic equivalents) was

based on self-reported time spent walking and performing moderate and/or vigorous activities, using the International Physical Activity Questionnaire (19).

Using SAS, version 9.1 (20), multivariate-adjusted discrete logistic models were constructed to assess factors associated with diabetes using three time points at which presence/absence of the outcome event was recorded (21). When incident cases were identified, lifestyle data from the preceding survey were used. Participants with incomplete data were excluded. Variables tested for association with diabetes included age, sex, family history, smoking, blood pressure, HDL cholesterol, triglycerides, BMI, METs, GI, and total dietary fiber and its fractions. GI and fiber (and its fractions) were measured as continuous variables in 10-unit and 5-g increments, respectively. Further analyses were conducted by age stratification ( $<70$  and  $\geq 70$  years).  $P < 0.05$  was used for statistical significance. Hazard ratios (HRs) and 95% CIs are shown.

**RESULTS** — During 10 years of follow-up, 138 incident cases of type 2 diabetes were identified among 1,833 participants. The incidence in this sample was 0.9% per year, compared with 0.8% per year among individuals aged 25+ years in the broader Australian population (22). Total carbohydrate, starch, sugar, and total fiber intake were not associated with diabetes risk in the age- and sex-adjusted model or the multivariate-adjusted model (Table 1).

Vegetable fiber had a significant inverse association with risk of type 2 diabetes in the age- and sex-adjusted and multivariate-adjusted models. After stratifying by age, a significant negative association between vegetable fiber and risk of incident diabetes was found in the age- and sex-adjusted model, but not after multivariate adjustment, in individuals aged  $<70$  years at baseline. No associations were found for those aged  $\geq 70$  years at baseline (26% of the cohort).

For all ages combined, there were positive trends of association between GI and risk of diabetes, but none reached statistical significance. In the age-stratified

From the <sup>1</sup>Human Nutrition Unit, University of Sydney, Sydney, Australia; the <sup>2</sup>Department of Ophthalmology, University of Sydney, Sydney, Australia; <sup>3</sup>NSW Centre for Public Health Nutrition, Human Nutrition Unit, University of Sydney, Sydney, Australia.

Address correspondence and reprint requests to Prof. Paul Mitchell, University of Sydney, Ophthalmology, Eye Clinic, Westmead Hospital, Westmead, NSW, Australia 2145. E-mail: paul\_mitchell@wmi.usyd.edu.au.

Received for publication 23 April 2007 and accepted in revised form 9 August 2007.

Published online ahead of print at <http://care.diabetesjournals.org> on 21 August 2007. DOI: 10.2337/dc07-0784.

J.B.M. is the director of a not-for-profit GI-based food endorsement program in Australia and manages the University of Sydney GI testing service, and A.B. is a consultant for Glycemic Index Ltd., a not-for-profit GI-based food endorsement program in Australia.

**Abbreviations:** FFQ, food frequency questionnaire; GI, glycemic index.

A table elsewhere in this issue shows conventional and Système International (SI) units and conversion factors for many substances.

© 2007 by the American Diabetes Association.

The costs of publication of this article were defrayed in part by the payment of page charges. This article must therefore be hereby marked "advertisement" in accordance with 18 U.S.C. Section 1734 solely to indicate this fact.

Table 1—HRs (95% CIs) for carbohydrate fractions, GI, and incidence of type 2 diabetes in a cohort of older Australians

| Nutrient          | Amount    | Age and sex adjusted |           |       | Multivariate adjusted* |           |       |
|-------------------|-----------|----------------------|-----------|-------|------------------------|-----------|-------|
|                   |           | HR                   | 95% CI    | P     | HR*                    | 95% CI    | P     |
| Carbohydrate      | 200 g/day | 1.06                 | 0.45–2.50 | 0.898 | 1.14                   | 0.43–3.00 | 0.792 |
| Sugar             | 100 g/day | 1.02                 | 0.62–1.67 | 0.949 | 1.09                   | 0.63–1.88 | 0.767 |
| Starch            | 100 g/day | 1.04                 | 0.53–2.02 | 0.920 | 1.08                   | 0.60–1.97 | 0.795 |
| Fiber             | 5 g/day   | 0.90                 | 0.81–1.01 | 0.068 | 0.90                   | 0.79–1.02 | 0.109 |
| Cereal fiber      | 5 g/day   | 0.96                 | 0.80–1.16 | 0.698 | 0.96                   | 0.78–1.20 | 0.742 |
| Fruit fiber       | 5 g/day   | 0.95                 | 0.79–1.13 | 0.531 | 0.94                   | 0.78–1.15 | 0.566 |
| Vegetable fiber   | 5 g/day   | 0.72                 | 0.57–0.93 | 0.010 | 0.76                   | 0.57–0.99 | 0.048 |
| <70 years of age† | 5 g/day   | 0.72                 | 0.54–0.96 | 0.027 | 0.78                   | 0.56–1.07 | 0.123 |
| ≥70 years of age‡ | 5 g/day   | 0.72                 | 0.44–1.17 | 0.188 | 0.69                   | 0.40–1.21 | 0.199 |
| GI                | 10 units  | 1.38                 | 0.92–2.07 | 0.124 | 1.50                   | 0.95–2.36 | 0.082 |
| <70 years of age† | 10 units  | 1.47                 | 0.93–2.34 | 0.103 | 1.75                   | 1.05–2.92 | 0.031 |
| ≥70 years of age‡ | 10 units  | 1.14                 | 0.48–2.68 | 0.765 | 0.80                   | 0.29–2.24 | 0.671 |

\*Adjusted for age, sex, family history of diabetes, smoking, triglycerides, HDL cholesterol, and METs, as well as vegetable fiber for the GI analyses. †n = 1,575; ‡n = 560.

and multivariate analyses, a significant positive association between GI and incident diabetes was found for individuals aged <70 years at baseline, but no association was found for those aged ≥70 years.

**CONCLUSIONS**— In a representative sample of older Australians, only vegetable fiber was independently associated with reduced risk of type 2 diabetes over a 10-year period. In a secondary analysis of people under 70 years of age, a high-GI carbohydrate diet was also linked to increased risk of diabetes. Our study is the first to use a FFQ validated specifically to assess GI.

Our study has limitations, including a relatively small sample size and relatively few incident diabetes cases. While the FFQ was not originally designed to assess GI, our analyses suggest that the tool reliably ranks individuals for fiber and GI. A similar FFQ was used in six earlier studies, but they have not been directly validated for their ability to measure GI (1,2,4,5,7,8).

Plausible mechanisms link certain types of carbohydrate to increased risk of diabetes (23). “Fast-acting” carbohydrates from high-GI foods increase blood glucose spikes and insulin demand. Insufficient  $\beta$ -cell capacity can result in impaired glucose tolerance and eventually type 2 diabetes (24). Diets high in cereal fiber and legumes may also improve insulin economy by “second meal” effects on postprandial glycemia (25). In the present study, peas, baked beans, and other legumes were classified as vegetables. It is therefore difficult to separate any protec-

tive effect of vegetable fiber per se from potential benefits related to reduced glycemia (i.e., low GI).

Our study supports the hypothesis that the type or quality of carbohydrate plays an important role in the etiology of type 2 diabetes. These findings, and those of similar studies, suggest that a dietary pattern characterized by high fiber and low-GI carbohydrates is sustainable over time and may represent an effective strategy to prevent type 2 diabetes.

## References

- Salmeron J, Ascherio A, Rimm EB, Colditz GA, Spiegelman D, Jenkins DJ, Stampfer MJ, Wing AL, Willett WC: Dietary fiber, glycemic load, and risk of NIDDM in men. *Diabetes Care* 20:545–550, 1997
- Salmeron J, Manson JE, Stampfer MJ, Colditz GA, Wing AL, Willett WC: Dietary fiber, glycemic load, and risk of non-insulin-dependent diabetes mellitus in women. *JAMA* 277:472–477, 1997
- Hodge AM, English DR, O'Dea K, Giles GG: Glycemic index and dietary fiber and the risk of type 2 diabetes. *Diabetes Care* 27:2701–2706, 2004
- Schulze MB, Liu S, Rimm EB, Manson JE, Willett WC, Hu FB: Glycemic index, glycemic load, and dietary fiber intake and incidence of type 2 diabetes in younger and middle-aged women. *Am J Clin Nutr* 80:348–356, 2004
- Zhang C, Liu S, Solomon CG, Hu FB: Dietary fiber intake, dietary glycemic load, and the risk for gestational diabetes mellitus. *Diabetes Care* 29:2223–2230, 2006
- Patel AV, McCullough ML, Pavluck AL, Jacobs EJ, Thun MJ, Calle EE: Glycemic load, glycemic index, and carbohydrate intake in relation to pancreatic cancer risk in a large US cohort. *Cancer Causes Control* 18:287–294, 2007
- Meyer KA, Kushi LH, Jacobs DR Jr, Slavin J, Sellers TA, Folsom AR: Carbohydrates, dietary fiber, and incident type 2 diabetes in older women. *Am J Clin Nutr* 71:921–930, 2000
- Stevens J, Ahn K, Juhaeri, Houston D, Steffan L, Couper D: Dietary fiber intake and glycemic index and incidence of diabetes in African-American and white adults: the ARIC study. *Diabetes Care* 25:1715–1721, 2002
- Attebo K, Mitchell P, Smith W: Visual acuity and the causes of visual loss in Australia: the Blue Mountains Eye Study. *Ophthalmology* 103:357–364, 1996
- Smith W, Mitchell P, Reay EM, Webb K, Harvey PW: Validity and reproducibility of a self-administered food frequency questionnaire in older people. *Aust NZJ Public Health* 22:456–463, 1998
- Webb KL, Schofield WN, Lazarus R, Smith W, Mitchell P, Leeder SR: Prevalence and socio-demographic predictors of dietary goal attainment in an older population. *Aust NZJ Public Health* 23:578–584, 1999
- World Health Organization: Definition, diagnosis, and classification of diabetes mellitus and its complications. Part 1. Diagnosis and classification of diabetes mellitus [article online], 1999. Geneva, World Health Org. Available from [http://whqlibdoc.who.int/hq/1999/WHO\\_NCD\\_NCS\\_99.2.pdf](http://whqlibdoc.who.int/hq/1999/WHO_NCD_NCS_99.2.pdf). Accessed 13 September 2007
- Willett WC, Sampson L, Browne ML, Stampfer MJ, Rosner B, Hennekens CH, Speizer FE: The use of a self-administered questionnaire to assess diet four years in the past. *Am J Epidemiol* 127:188–199, 1988
- Willett W: *Nutritional Epidemiology*. New York, Oxford University Press, 1998
- DBASE IV [Computer program], 1991.

- Scotts Valley, CA, Borland International Inc.
16. Department of Community Services and Health: *NUTTAB 90 Nutrient Data Table for Use in Australia*. Canberra, Australia, Australian Government Publishing Service, 1990
  17. Foster-Powell K, Holt SH, Brand-Miller JC: International table of glycemic index and glycemic load values: 2002. *Am J Clin Nutr* 76:5–56, 2002
  18. Barclay AW, Flood VM, Brand-Miller JC, Mitchell P: Validity of carbohydrate, glycemic index and glycemic load data obtained using a semi-quantitative food-frequency questionnaire. *Public Health Nutrition*. In press
  19. Craig CL, Marshall AL, Sjostrom M, Bauman AE, Booth ML, Ainsworth BE, Pratt M, Ekelund U, Yngve A, Sallis JF, Oja P: International physical activity questionnaire: 12-country reliability and validity. *Med Sci Sports Exerc* 35:1381–1395, 2003
  20. SAS Institute Inc.: *SAS/STAT Users Guide*. Version 9.1, 9th ed. Cary, NC, SAS Institute Inc., 2006
  21. Hosmer DW, Lemeshow S: *Applied Logistic Regression*. New York, John Wiley & Sons, Inc., 1989
  22. Cameron AJ, Welborn TA, Zimmet PZ, Dunstan DW, Owen N, Salmon J, Dalton M, Jolley D, Shaw JE: Overweight and obesity in Australia: the 1999–2000 Australian Diabetes, Obesity and Lifestyle Study (AusDiab). *Med J Aust* 178:427–432, 2003
  23. Ludwig DS: The glycemic index: physiological mechanisms relating to obesity, diabetes, and cardiovascular disease. *JAMA* 287:2414–2423, 2002
  24. Pawlak DB, Kushner JA, Ludwig DS: Effects of dietary glycaemic index on adiposity, glucose homeostasis, and plasma lipids in animals. *Lancet* 364:778–785, 2004
  25. Weickert MO, Mohlig M, Koebnick C, Holst JJ, Namsolleck P, Ristow M, Osterhoff M, Rochlitz H, Rudovich N, Spranger J, Pfeiffer AF: Impact of cereal fibre on glucose-regulating factors. *Diabetologia* 48:2343–2353, 2005
